# Supplementary material for: Criticality for shear-induced gelation of charge-stabilized colloids
Source: Royal Society of Chemistry journal article supplement (doi:10.1039/c002043e), 2010-01-01
Supplement: c002043e.pdf [file c002043e.pdf]

# Criticality for shear-induced gelation of charge-stabilized colloids

Delong Xie<sup>a,b</sup>, Hua Wu<sup>a</sup>, Alessio Zaccone<sup>a</sup>, Leonie Braun<sup>c</sup>, Huanqin Chen<sup>b</sup> and Massimo Morbidelli<sup>\*a</sup>

*a.* Institute for Chemical and Bioengineering, Department of Chemistry and Applied Biosciences, ETH Zurich, 8093 Zurich, Switzerland

*b.* School of Chemistry and Chemical engineering, South China University of Technology, 510640 Guangzhou, Guangdong, China

*c.* BASF SE, GKT/S - B001, 67056 Ludwigshafen, Germany

## Electronic supplementary information

### Part 1: The typical liquid-like and solid-like states of the colloidal systems after passing through the z-MC.

Note that the solid-like sample is of cylindrical shape, which results from the shape of the outlet tube after passing through the z-MC.

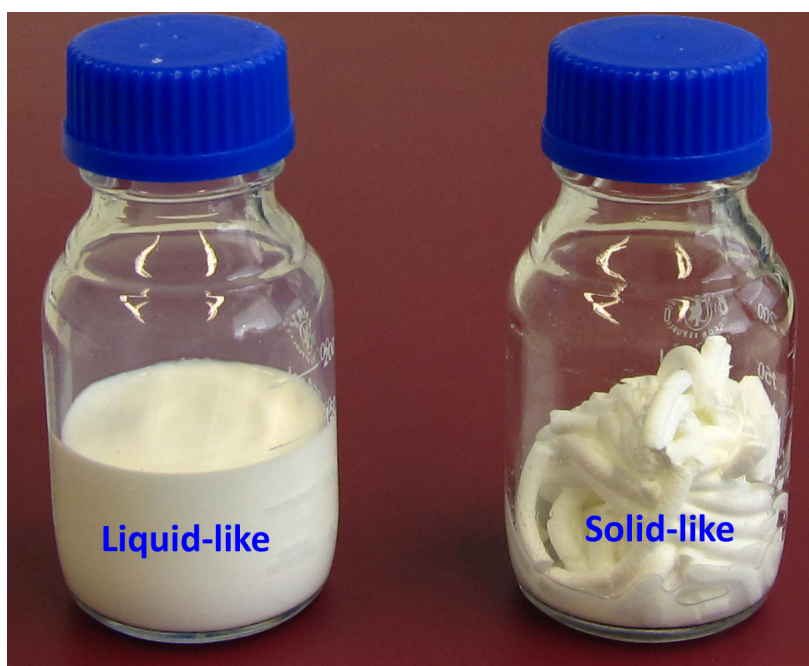

## Part 2: Estimation of the interaction barrier $U_{max}$ and the bonding strength $h$

In the frame of classical DLVO theory, accounting for the short-range Born repulsion, the colloidal interaction energy can be computed as the sum of three contributions, the van der Waals attractive interaction,  $U_A$ , the electrostatic repulsive interaction,  $U_R$ , and the Born repulsion,  $U_{Born}$ , as follows:

$$U = U_A + U_R + U_{Born} \quad (S1)$$

To compute  $U_A$ , the well-known Hamaker relation is used:

$$U_A = -\frac{A_H}{6} \left\{ \frac{2}{l^2 - 4} + \frac{2}{l^2} + \ln \left[ 1 - \frac{4}{l^2} \right] \right\} \quad (S2)$$

where  $A_H$  is the Hamaker constant, and  $l=r/R_p$  with  $r$  the interparticle center-to-center distance. A value of  $A_H=1.3 \times 10^{-20}$  J for polystyrene<sup>1</sup> is used in this work. For  $U_R$ , we use the modified Hogg-Healy-Fuersteneau expression derived by Sader et al.,<sup>2</sup>

$$U_R = \frac{4\pi\epsilon_r\epsilon_0 R_p \psi^2}{l} \ln[1 + \exp(-\kappa R_p(l-2))] \quad (S3)$$

which can be applied for both small and large values of  $\kappa R_p(l-2)$ , where  $\epsilon_r$  is the relative dielectric constant of the dispersion medium,  $\epsilon_0$  the permittivity of vacuum,  $\psi$  the surface potential and  $\kappa$  the reciprocal Debye length, defined as

$$\kappa \equiv \left( N_A e^2 \sum_i C_i z_i^2 / \epsilon_r \epsilon_0 kT \right)^{1/2} \quad (S4)$$

where  $N_A$  is the Avogadro constant, and  $C_i$  and  $z_i$  are the bulk concentration and charge valency of the  $i$ -th ion, respectively. For  $U_{Born}$ , we use the expression made by Feke et al.,<sup>3</sup>

$$U_{Born} = N_{12} \frac{1}{l} \left[ \frac{l^2 - 14l + 54}{(l-2)^7} + \frac{-2l^2 + 60}{l^7} + \frac{l^2 + 14l + 54}{(l+2)^7} \right] \quad (S5)$$

where  $N_{12}$  is a parameter expressing the strength of the van der Waals attraction relative to the Born repulsion, which should be in the range of  $10^{-18}$  to  $10^{-23}$  for most colloidal systems.

For the present systems, we use a value of  $N_{I2}=1\times 10^{-21}$ .

It is seen that the most important quantity for computing the colloidal interactions at the criticality for solid-like transition is the surface potential,  $\psi$ . To estimate it, we first assume that at  $\phi=5.0\times 10^{-4}$ , where the zeta-potential was measured, the surface potential,  $\psi$ , is equal to the zeta-potential. Then, based on the following usual linear approximation, we can estimate the surface charge density,  $\sigma$ ,

$$\sigma = \varepsilon_r \varepsilon_0 \kappa \psi \quad (\text{S6})$$

Since all the colloidal systems used in this work have been cleaned by the resins, the ionic strength arises mainly from dissociation of the counterions ( $\text{K}^+$ ) from the surface charge groups. Moreover, at the very low particle volume fraction of  $\phi=5.0\times 10^{-4}$ , where the zeta-potential was measured, the  $\text{K}^+$  concentration is very low (even completely dissociated), and the ions in the systems are dominated by  $\text{H}^+$  and  $\text{OH}^-$  from dissociation of water. In fact, the measured conductivity in this case is basically equal to that of pure water. Therefore, at  $\phi=5.0\times 10^{-4}$ , the  $1/\kappa$  value was estimated from the  $\text{H}^+$  and  $\text{OH}^-$  concentrations and equal to  $9.62\times 10^{-7}$  m, with which the estimated values for the charge density  $\sigma$  from eqn (S6) are listed in Table 1.

Then, assuming that all the  $\text{K}^+$  ions are dissociated from the surface charge groups, the  $\text{K}^+$  concentrations at the criticality,  $\phi=\phi_g$ , can be computed from the  $\sigma$  values, and are used to estimate the  $1/\kappa$  values at the criticality, which are given in Table 1. With the values of  $\sigma$  and  $1/\kappa$ , we can calculate the surface potentials,  $\psi$  at the criticality, again from eqn (S6), as reported in Table 1.

Now, we are ready to compute the total interaction energy from eqn (S1), with the values of all the parameters in Table 1. Figure S1 shows the computed total interaction energy,  $U$ , as a function of the interparticle surface-to-surface distance,  $r-R_p$ , for the three colloidal systems

of different particle radii, at the criticality for solid-like transition. It is seen that both the primary minimum,  $U_{min}$ , and the interaction barrier,  $U_{max}$ , increases as the particle radius increases. However, the difference,  $U_b=U_{max}-U_{min}=hk_B T$ , does not change very much with the particle radius, which can be clearly seen from the estimated  $h$  values in Table 1.

## References

- 1 S. H. Maron, M. E. Elder and I. N. Ulevitch, *J. Colloid Sci.*, 1954, **9**, 89.
- 2 J. E. Sader, S. L. Carnie and D. Y. C. Chan, *J. Colloid Interface Sci.*, 1995, **171**, 46.
- 3 D. L. Feke, N. D. Prabhu and J. A. Mann, *J. Phys. Chem.*, 1984, **88**, 5735.

**Table 1** Colloidal interaction parameters at the criticality for solid-like transition for the three colloidal systems of different particle sizes.

| $R_p$<br>(nm) | $\phi_g$ | $\sigma$<br>(C/m <sup>2</sup> ) | $1/\kappa$<br>(m)     | $\psi$<br>(V) | $A_H$<br>(J)          | $N_{12}$            | $U_{max}$<br>( $k_B T$ ) | $h$ |
|---------------|----------|---------------------------------|-----------------------|---------------|-----------------------|---------------------|--------------------------|-----|
| 61            | 0.09     | $4.86 \times 10^{-5}$           | $2.76 \times 10^{-7}$ | 0.0193        | $1.3 \times 10^{-20}$ | $1 \times 10^{-21}$ | 14.3                     | 211 |
| 128           | 0.15     | $4.83 \times 10^{-5}$           | $2.14 \times 10^{-7}$ | 0.0214        | $1.3 \times 10^{-20}$ | $1 \times 10^{-21}$ | 38.1                     | 209 |
| 288           | 0.22     | $3.92 \times 10^{-5}$           | $2.28 \times 10^{-7}$ | 0.0228        | $1.3 \times 10^{-20}$ | $1 \times 10^{-21}$ | 100.7                    | 204 |

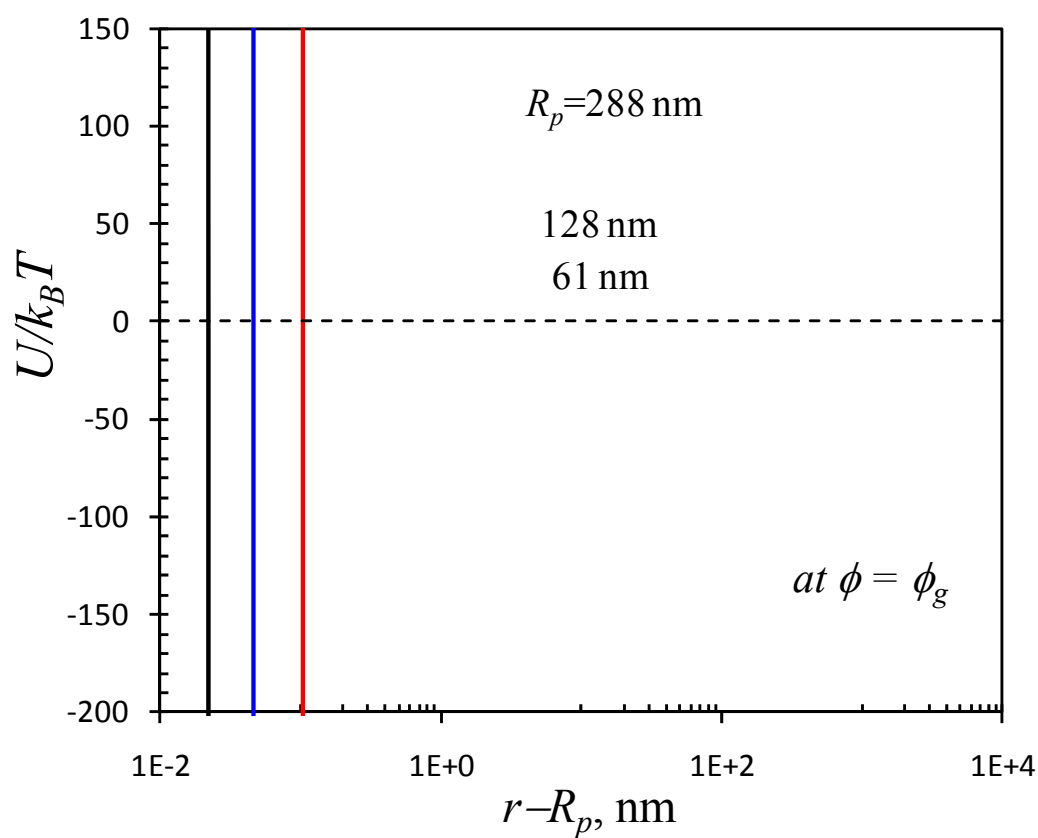

**Fig. S1** Interparticle interaction energy,  $U/k_B T$ , at the criticality for the liquid-like to solid-like transition, as a function of the surface-to-surface distance,  $r - R_p$ , for the three colloidal systems of different particle sizes. Parameters used for the calculations are listed in Table 1.
